# Supplementary material for: Multichannel charge transfer enhanced radiative decay and RISC in TADF materials containing multiple donors and acceptors
Source: Royal Society of Chemistry journal article supplement (doi:10.1039/d2tc03875g), 2022-01-01
Supplement: d2tc03875g1.pdf [file d2tc03875g1.pdf]

## Supporting Information

For

### **Multichannel charge transfer enhanced radiative decay and RISC in TADF material containing multiple donors and acceptors**

**Zhaolong He,<sup>a</sup> Jiuyan Li,<sup>a\*</sup> Di Liu,<sup>a,b\*</sup> Huihui Wan,<sup>c</sup> Yongqiang Mei,<sup>a</sup> Chunlong**

**Shi<sup>a</sup>**

<sup>a</sup> Frontiers Science Center for Smart Materials, College of Chemical Engineering,  
Dalian University of Technology, 2 Linggong Road, Dalian, 116024, China. E-mail:

[jiuyanli@dlut.edu.cn](mailto:jiuyanli@dlut.edu.cn), [liudi@dlut.edu.cn](mailto:liudi@dlut.edu.cn)

<sup>b</sup> State Key Laboratory of Luminescent Materials and Devices, South China

University of Technology, Guangzhou, 510640, China.

<sup>c</sup> Instrumental Analysis Center, Dalian University of Technology, Dalian, 116024,  
China.

### **Contents**

- 1. Instruments and methods**
- 2. Compound synthesis**
- 3. Supplementary figures and tables**

## 1. Instruments and methods

**1.1 General Information.** Bruker Avance II 400 was used to record  $^1\text{H}$  and NMR data based on tetramethylsilane (TMS) as internal standard and chloroform-d ( $\text{CDCl}_3$ ) as the solvent. The high-resolution mass (HRMS) spectra were measured using LTQ Orbitrap XL for HRMS-ESI. The electrochemical workstation (BAS100B, USA) and the traditional three-electrode configuration, including a glass-carbon electrode, a Pt-wire, and a saturated calomel electrode (SCE) were used to measure the electrochemical performance of cyclic voltammetry (CV) at a scan rate of  $100 \text{ mV s}^{-1}$ . The samples in dichloromethane (DCM, anodic) or *N,N*-dimethylformamide (DMF, cathodic) solutions containing  $0.1 \text{ M } [\text{Bu}_4\text{N}]\text{PF}_6$  as the electrolyte were deoxygenated with nitrogen for 10 mins before scanning. The UV-vis absorption spectra were measured on Perkin-Elmer Lambda 650 spectrophotometer. The fluorescence spectra at room temperature and the temperature-dependent transient PL spectra were obtained from the Edinburgh FLS1000 fluorescence spectrophotometer while the phosphorescence spectra were recorded using a Hitachi F-7000 fluorescence spectrometer at  $77 \text{ K}$  in 2-MeTHF. Photoluminescence quantum yields (PLQYs) were measured on a HAMAMATSU absolute PL quantum yield spectrometer C11347.

The density functional theory (DFT) calculation at the B3LYP-D3BJ/def2-SVP level was used to optimize the ground state geometries of the investigated molecules. Time-dependent density functional theory (TD-DFT) calculations were performed at PBE0/def2-SVP using the optimized ground state geometries. The hole/particle were

deduced from the natural transition orbitals (NTOs) analysis based on TD-DFT results.<sup>1</sup> The spin-orbit coupling matrix elements (SOCME) were calculated by ORCA program. Independent gradient model based on Hirshfeld partition of molecular density (IGMH) method is a visual analysis of chemical systems interactions, wherein  $\delta g = \delta g^{\text{inter}} + \delta g^{\text{intra}}$ ,  $\delta g$  represents interactions between all atoms in the current system,  $\delta g^{\text{inter}}$  and  $\delta g^{\text{intra}}$  represent interactions of interfragment and intrafragment, respectively. Sign  $(\lambda_2)\rho$  were calculated and visualized using Multiwfn and VMD.<sup>2,3</sup>

**1.2 OLED fabrication and measurements.** The pre-cleaned ITO glass substrates with the sheet resistance of  $15 \Omega \text{ m}^{-2}$  were treated by UV-ozone for 30 minutes. A 40 nm thick PEDOT: PSS film was first spin-coated on the ITO glass substrate and baked in the air at  $120 \text{ }^\circ\text{C}$  for 30 minutes. The substrate was then transferred to a vacuum chamber where the organic layers were deposited at a basic pressure of less than  $10^{-6}$  Torr (1 Torr = 133.32 Pa). Finally, a 1 nm thin layer of LiF film was deposited on the organic layers, and then 200 nm Al film was deposited as the cathode. The overlap part of the two electrodes was the emission area of each pixel, which was  $9 \text{ mm}^2$ . A PR705 photometer and source-measure-unit Keithley 236 were used to measure the EL spectra, CIE coordinates, and  $J$ - $V$ - $B$  curves of the devices under ambient conditions. The forward-viewing external quantum efficiency was calculated with an assumption of a Lambertian emission profile by using the current efficiency, EL spectra, and human photopic sensitivity.

**1.3 Calculation of the rate constants of the different kinetic processes**

The following formula were used for calculations:

$$\Phi = \Phi_{PF} + \Phi_{DF} \quad (E1)$$

$$k_r = \Phi_{PF}/\tau_{PF} \quad (E2)$$

$$\Phi = k_r/(k_r + k_{nr}) \quad (E3)$$

$$\Phi_{PF} = k_r/(k_r + k_{isc} + k_{nr}) \quad (E4)$$

$$k_{risc} = k_p k_d \Phi_{DF}/k_{isc} \Phi_{PF} \quad (E5)$$

$$k_p = \frac{1}{\tau_{PF}} \quad (E6)$$

$$k_d = \frac{1}{\tau_{DF}} \quad (E7)$$

$k_r$ ,  $k_{nr}$ ,  $k_{isc}$ , and  $k_{risc}$  represent the rate constants of radiative, non-radiative, intersystem crossing (ISC) and RISC, respectively.  $\Phi$ ,  $\Phi_{PF}$ , and  $\Phi_{DF}$  represent total PLQY, PLQY of the prompt component and delayed component, respectively.  $\tau_{PF}$  and  $\tau_{DF}$  are lifetimes of the prompt and delayed components, respectively.<sup>4</sup>  $\Phi$ ,  $\tau_{PF}$ , and  $\tau_{DF}$  were measured experimentally.<sup>4, 5</sup> All data are shown in Table 1.

## 2. Compound synthesis

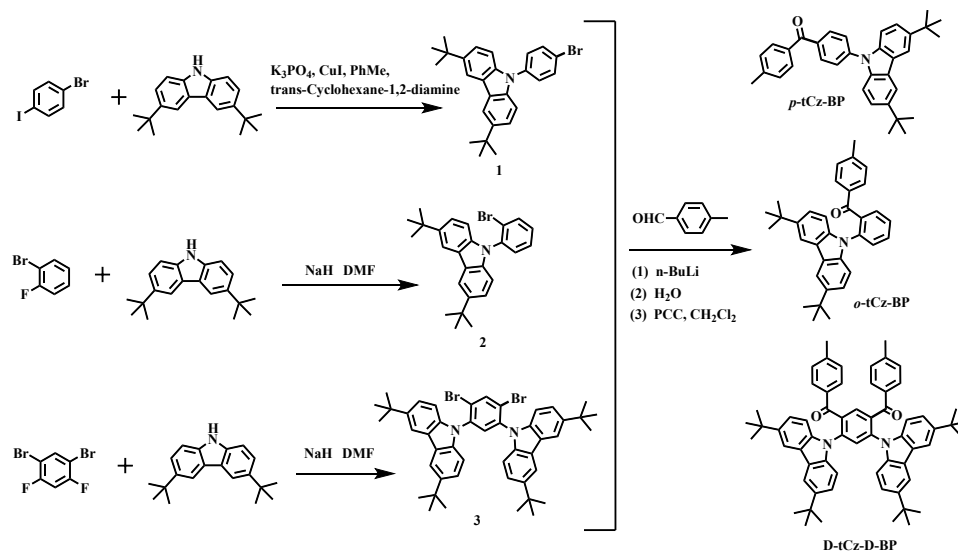

**Scheme S1** Structures and synthetic routes of *p*-tCz-BP, *o*-tCz-BP and D-tCz-D-BP.

The key intermediates of 1, 2 and 3 were synthesized according to the literature methods.<sup>6-8</sup>

*General procedure for synthesis of (4-(3,6-di-tert-butyl-9H-carbazol-9-yl)phenyl)(p-tolyl)methanone (p-tCz-BP), (2-(3,6-di-tert-butyl-9H-carbazol-9-yl)phenyl)(p-tolyl)methanone (o-tCz-BP) and (4,6-bis(3,6-di-tert-butyl-9H-carbazol-9-yl)-1,3-phenylene)bis(p-tolylmethanone) (D-tCz-D-BP).* Compound 1 (2.3 g, 5.3 mmol) was added to dry THF in a three-necked flask under nitrogen. The solution was cooled to -78 °C, and 2.5 mL of n-BuLi (2.5 M) was added dropwise using a syringe. The mixture was stirred for 1 h at -78 °C and then 4-methylbenzaldehyde (10.6 mmol) was slowly added into the reaction solution. The mixture was stirred for 1 h at -78 °C and then stirred overnight at room temperature. Subsequently, the mixture was stirred for 10 minutes under ice-water. Then, 50 mL of ice water was added to quench the reaction and perform a hydrolysis reaction. The resulting mixture was extracted with dichloromethane three times. The combined organic layers were

dried over anhydrous magnesium sulfate. After filtration and solvent evaporation, the crude product that without further purification or characterization was dissolved in 40 mL of dichloromethane in a 100 mL round bottom flask, then pyridinium chlorochromate (PCC) (4.7 g, 21.8 mmol) was added. The mixture was stirred for 12 h. The precipitate was filtered and the filtrate was poured into saturated saltwater and extracted with dichloromethane. The organic layer was then collected, dried with magnesium sulfate, filtered, and evaporated under reduced pressure. After solvent evaporation, the crude product was purified by column chromatography over silica gel with a dichloromethane/petroleum ether (1 : 30 v/v) mixture as an eluent.

*p*-tCz-BP: white solid, yield 40%. <sup>1</sup>H NMR (400 MHz, CDCl<sub>3</sub>) δ 8.15 (s, 2H), 8.03 (d, *J* = 8.2 Hz, 2H), 7.82 (d, *J* = 7.8 Hz, 2H), 7.71 (d, *J* = 8.2 Hz, 2H), 7.51 – 7.46 (m, 4H), 7.35 (d, *J* = 7.8 Hz, 2H), 2.48 (s, 3H), 1.48 (s, 18H). HRMS-ESI (*m/z*): cal. for C<sub>34</sub>H<sub>35</sub>NO 473.2719; Found: 474.2785 [M+H]<sup>+</sup>. Anal. calcd for C<sub>34</sub>H<sub>35</sub>NO: C, 86.22; H, 7.45; N, 2.96; Found: C, 86.24; H, 7.49; N, 2.98.

*o*-tCz-BP: white solid, yield 35%. <sup>1</sup>H NMR (400 MHz, CDCl<sub>3</sub>) δ 7.83 (d, *J* = 7.9 Hz, 1H), 7.79 (d, *J* = 1.4 Hz, 2H), 7.77 – 7.73 (m, 1H), 7.62 – 7.58 (m, 2H), 7.39 (s, 1H), 7.36 (d, *J* = 2.5 Hz, 1H), 7.14 (s, 1H), 7.12 (s, 1H), 6.86 (d, *J* = 8.1 Hz, 2H), 6.46 (d, *J* = 7.9 Hz, 2H), 2.03 (s, 3H), 1.42 (s, 18H). HRMS-ESI (*m/z*): cal. for C<sub>34</sub>H<sub>35</sub>NO 473.2719; Found: 474.2790 [M+H]<sup>+</sup>. Anal. calcd for C<sub>34</sub>H<sub>35</sub>NO: C, 86.22; H, 7.45; N, 2.96; Found: C, 86.24; H, 7.51; N, 2.98.

D-tCz-D-BP: pale-yellow solid, yield 30%. <sup>1</sup>H NMR (400 MHz, CDCl<sub>3</sub>) δ 8.32 (s, 1H), 7.91 (s, 1H), 7.81 (s, 4H), 7.44 (d, *J* = 8.6 Hz, 4H), 7.31 (d, *J* = 8.6 Hz, 4H),

7.02 (d,  $J = 8.0$  Hz, 4H), 6.54 (d,  $J = 7.9$  Hz, 4H), 2.08 (s, 6H), 1.43 (s, 36H). HRMS-ESI ( $m/z$ ): cal. for  $C_{62}H_{64}N_2O_2$  868.4968; Found: 891.4855  $[M+Na]^+$ . Anal. calcd for  $C_{62}H_{64}N_2O_2$ : C, 85.67; H, 7.42; N, 3.22; Found: C, 85.69; H, 7.50; N, 3.20.

### 3. Supplementary Figures and Tables

**Table S1** The corresponding energy levels of *p*-tCz-BP, *o*-tCz-BP and D-tCz-D-BP.

| Compound         | LUMO+1<br>[eV] | LUMO<br>[eV] | HOMO<br>[eV] | HOMO-1<br>[eV] | HOMO-2<br>[eV] | HOMO-3<br>[eV] |
|------------------|----------------|--------------|--------------|----------------|----------------|----------------|
| <i>p</i> -tCz-BP | -0.98          | -1.98        | -5.54        | -5.90          | -6.81          | -6.88          |
| <i>o</i> -tCz-BP | -0.87          | -1.93        | -5.32        | -5.63          | -6.62          | -6.88          |
| D-tCz-D-BP       | -1.89          | -2.25        | -5.41        | -5.48          | -5.74          | -5.74          |

**Table S2** Spin-orbit coupling matrix elements (SOCME) of *p*-tCz-BP, *o*-tCz-BP and D-tCz-D-BP.

| Compound         | SOC (cm <sup>-1</sup> ) | T <sub>1</sub> | T <sub>2</sub> | T <sub>3</sub> | T <sub>4</sub> | T <sub>5</sub> | T <sub>6</sub> |
|------------------|-------------------------|----------------|----------------|----------------|----------------|----------------|----------------|
| <i>p</i> -tCz-BP | S <sub>1</sub>          | 0.694          | 0.546          | 1.040          | 0.349          | 0.820          | 0.132          |
|                  | S <sub>2</sub>          | 0.280          | 0.276          | 0.553          | 0.395          | 0.241          | 0.045          |
|                  | S <sub>3</sub>          | 16.741         | 12.938         | 21.283         | 0.132          | 10.631         | 0.268          |
|                  | S <sub>4</sub>          | 0.214          | 0.251          | 0.226          | 0.082          | 0.094          | 0.195          |
|                  | S <sub>5</sub>          | 0.638          | 0.779          | 0.122          | 0.105          | 0.066          | 0.030          |
|                  | S <sub>6</sub>          | 0.494          | 0.352          | 0.610          | 0.199          | 0.221          | 0.022          |
| D-tCz-D-BP       | S <sub>1</sub>          | 0.357          | 8.033          | 1.030          | 6.168          | 0.033          | 1.814          |
|                  | S <sub>2</sub>          | 1.093          | 1.083          | 1.074          | 2.776          | 0.099          | 0.769          |

|            |                |       |        |       |        |       |       |
|------------|----------------|-------|--------|-------|--------|-------|-------|
|            | S <sub>3</sub> | 3.644 | 23.957 | 4.796 | 24.638 | 0.111 | 5.872 |
|            | S <sub>4</sub> | 1.669 | 2.602  | 0.561 | 0.668  | 0.031 | 0.248 |
|            | S <sub>5</sub> | 0.457 | 2.684  | 0.572 | 0.491  | 0.103 | 0.177 |
|            | S <sub>6</sub> | 2.430 | 0.441  | 0.277 | 0.345  | 0.037 | 1.845 |
| D-tCz-D-BP | S <sub>1</sub> | 0.133 | 1.305  | 2.637 | 0.932  | 2.678 | 2.458 |
|            | S <sub>2</sub> | 1.269 | 0.151  | 0.520 | 0.660  | 0.738 | 2.051 |
|            | S <sub>3</sub> | 0.425 | 0.257  | 0.574 | 0.333  | 0.592 | 1.341 |
|            | S <sub>4</sub> | 0.082 | 0.293  | 0.435 | 0.321  | 0.574 | 0.935 |
|            | S <sub>5</sub> | 1.012 | 0.369  | 2.534 | 0.896  | 2.436 | 1.840 |
|            | S <sub>6</sub> | 0.334 | 0.571  | 3.490 | 1.980  | 3.709 | 5.164 |

**Table S3** Crystal data and structure refinement for D-tCz-D-BP.

| Identification code     | D-tCz-D-BP                                                    |
|-------------------------|---------------------------------------------------------------|
| Empirical formula       | C <sub>62</sub> H <sub>64</sub> N <sub>2</sub> O <sub>2</sub> |
| CCDC No.                | 2174202                                                       |
| Formula weight          | 869.15                                                        |
| Temperature/K           | 200                                                           |
| Space group             | P1                                                            |
| a (Å)                   | 11.744(6)                                                     |
| b (Å)                   | 12.517(9)                                                     |
| c (Å)                   | 18.534(10)                                                    |
| α (°)                   | 91.23(2)                                                      |
| β (°)                   | 106.013(8)                                                    |
| γ (°)                   | 101.022(9)                                                    |
| Volume(Å <sup>3</sup> ) | 2563(3)                                                       |
| Z                       | 2                                                             |
| F(000)                  | 932.0                                                         |
| Data completeness       | 0.985                                                         |

**Table S4** Experimentally determined physical parameters of *p*-tCz-BP, *o*-tCz-BP and D-tCz-D-BP.



| Compound         | $\lambda_{\text{abs}}^{\text{a}}$<br>[nm] | $\lambda_{\text{em}}^{\text{a}}$<br>[nm] | $E_{\text{S}}/E_{\text{T}}^{\text{b}}$<br>[eV] | $\Delta E_{\text{ST}}^{\text{c}}$<br>[eV] | HOMO<br>/LUMO <sup>d</sup><br>[eV] | $E_{\text{g}}^{\text{d}}$<br>[eV] |
|------------------|-------------------------------------------|------------------------------------------|------------------------------------------------|-------------------------------------------|------------------------------------|-----------------------------------|
| <i>p</i> -tCz-BP | 296, 330,<br>347, 363                     | 467                                      | 3.10/2.87                                      | 0.23                                      | -5.55/-2.79                        | 2.76                              |
| <i>o</i> -tCz-BP | 296, 330,<br>341, 370                     | 485                                      | 3.00/2.92                                      | 0.08                                      | -5.52/-2.67                        | 2.85                              |
| D-tCz-D-BP       | 296, 330,<br>344, 381                     | 450,530                                  | 2.86/2.71                                      | 0.15                                      | -5.58/-2.89                        | 2.69                              |

<sup>a</sup> Absorption and PL peak wavelengths in dilute toluene solution at RT. <sup>b</sup> Measured from the highest-energy onset wavelengths of steady state PL spectra (RT) and phosphorescence spectra (with ideally 60ms delay time following pulsed excitation) in 8 wt% doped PPF films. <sup>c</sup> Energy splitting between  $S_1$  and  $T_1$  estimated as  $\Delta E_{\text{ST}} = E_{\text{S}} - E_{\text{T}}$ . <sup>d</sup> HOMO and LUMO energy levels determined from the electrochemical oxidation and reduction potentials.

**Table S5** Summary of the key performances of the reported TBCT and TSCT type TADF-OLEDs in recent years.

| Emitter                | EL (nm)    | EQE (%)     | Ref.             |
|------------------------|------------|-------------|------------------|
| <b><i>o</i>-tCz-BP</b> | <b>468</b> | <b>11.1</b> | <b>This work</b> |
| <b>D-tCz-D-BP</b>      | <b>490</b> | <b>24.9</b> | <b>This work</b> |
| SF12oTz                | 496        | 22.4        | 9                |
| SF23oTz                | 484        | 19.6        | 9                |
| SF34oTz                | 482        | 14.6        | 9                |
| 1CTF                   | 490        | 17.5        | 10               |
| 2CTF                   | 503        | 19.8        | 10               |
| 3CTF                   | 508        | 22.6        | 10               |
| <i>o</i> B-2Cz         | 486        | 28.1        | 11               |
| <i>o</i> B-2tCz        | 498        | 27.5        | 11               |
| TP-BP-DMAC             | 488        | 20.5        | 12               |
| TP-BP-PXZ              | 531        | 13.8        | 12               |
| SFO-SPAC               | 502        | 23.5        | 13               |
| SFO-DMAC               | 532        | 15.6        | 13               |
| T-CNDF-T-tCz           | 484        | 21.0        | 14               |
| S-CNDF-S-tCz           | 466        | 2.6         | 14               |
| S-CNDF-D-tCz           | 466        | 3.7         | 14               |
| 4Cz-DPS                | 524        | 20.7        | 15               |
| 2Cz-DPS                | 518        | 28.7        | 15               |

**Table S6** Summary of the key performances of TADF molecule act as emitter, host

and host emitter in OLEDs.

| Compound          | EQE/CIE <sup>a</sup>               | EQE/CIE <sup>b</sup>               | EQE/CIE <sup>c</sup>               | Ref.             |
|-------------------|------------------------------------|------------------------------------|------------------------------------|------------------|
| <b>D-tCz-D-BP</b> | <b>24.9%</b><br><b>(0.22,0.40)</b> | <b>21.0%</b><br><b>(0.62,0.36)</b> | <b>18.8%</b><br><b>(0.41,0.42)</b> | <b>This work</b> |
| DCB-BP-SFAC       | 23.5%<br>(0.199,0.417)             | 13.6%<br>(0.658,0.326)             | 17.8%<br>(0.333,0.397)             | 16               |
| SBF-BP-DMAC       | 24.5%<br>(0.308,0.570)             | 26.8%<br>(0.477,0.518)             | 21.0%<br>(0.442,0.493)             | 17               |
| Tri-o-2PO         | --<br>--                           | 22.1%<br>--                        | 21.1%<br>(0.38,0.45)               | 18               |
| <i>o</i> -CzTrz   | 17.5%<br>(0.21,0.43)               | 13.9%<br>(0.28,0.56)               | 20.3%<br>(0.34,0.42)               | 19               |
| <i>m</i> -CzTrz   | 19.2%<br>(0.25,0.44)               | 20.8%<br>(0.31,0.62)               | 19.8%<br>(0.38,0.50)               | 19               |

<sup>a</sup> Compound served as emitter for doped OLED. <sup>b</sup> Compound served as host for PhOLED. <sup>c</sup> Compound served as host emitter for single emissive layer WOLED.

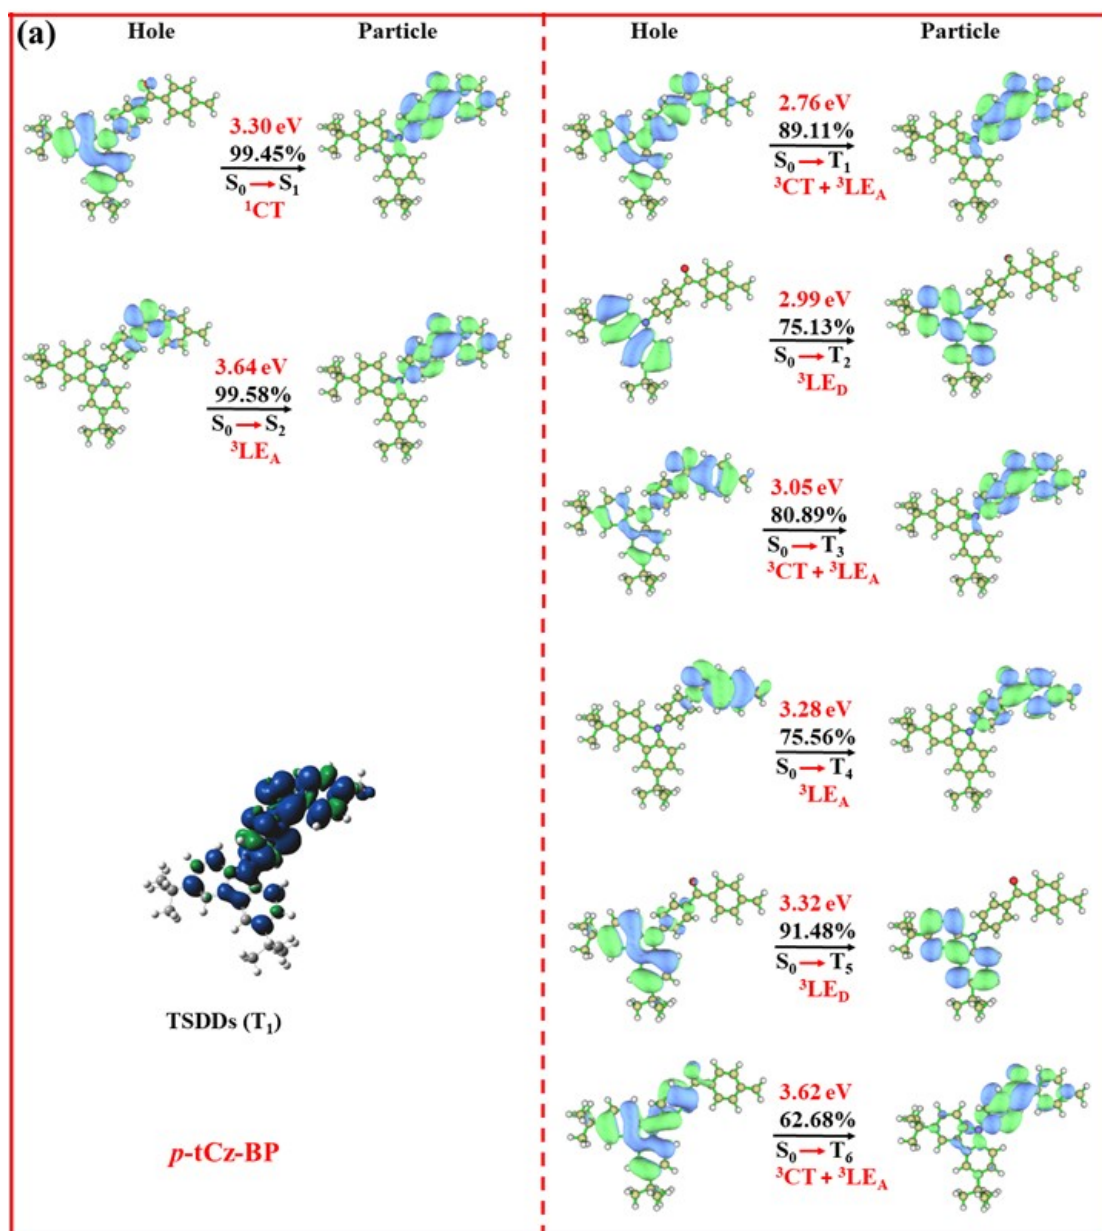

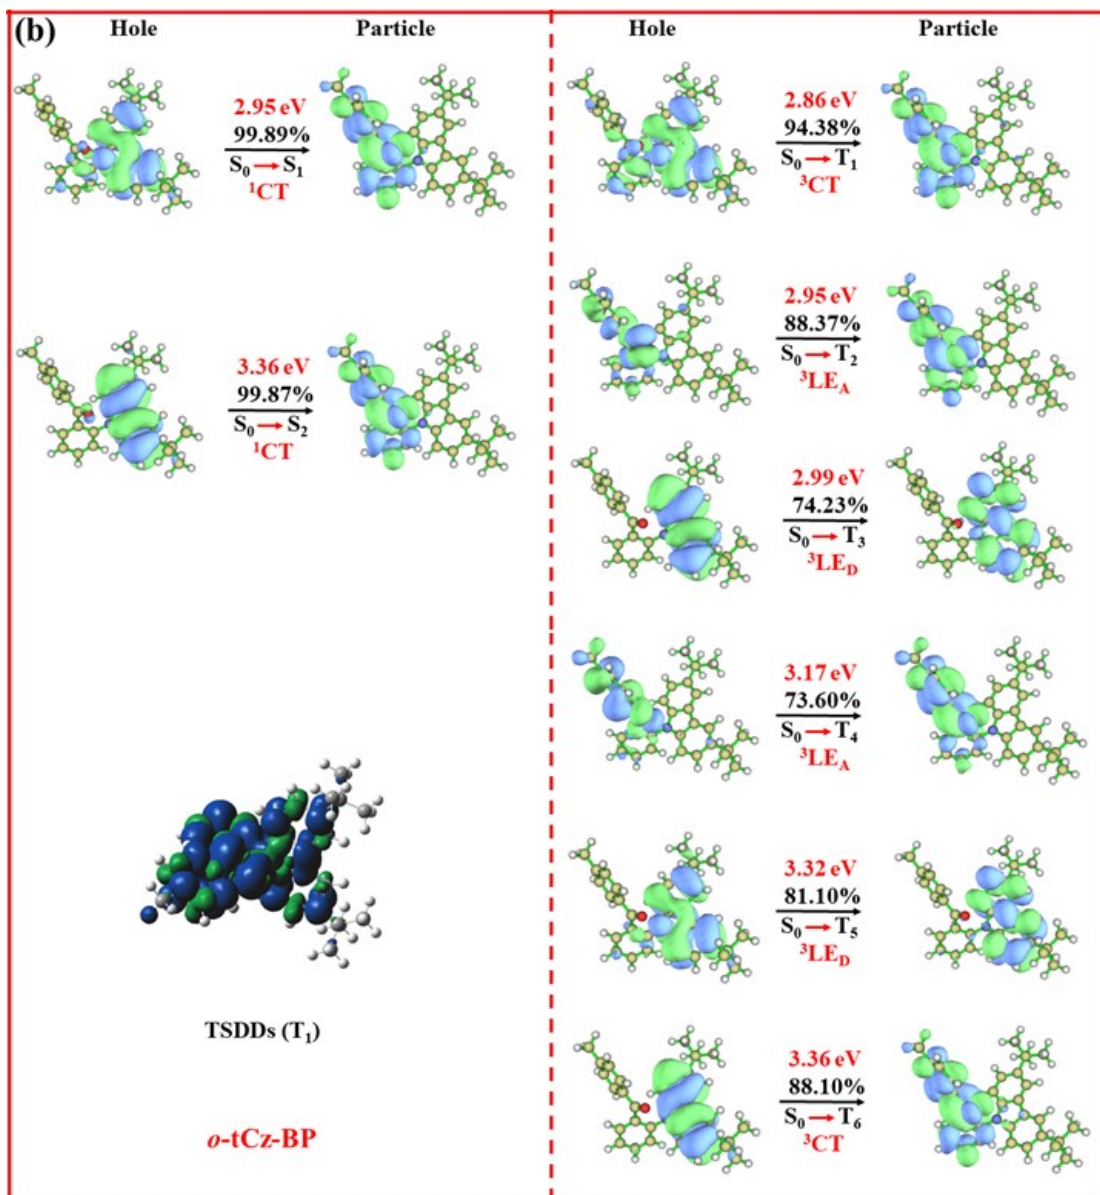

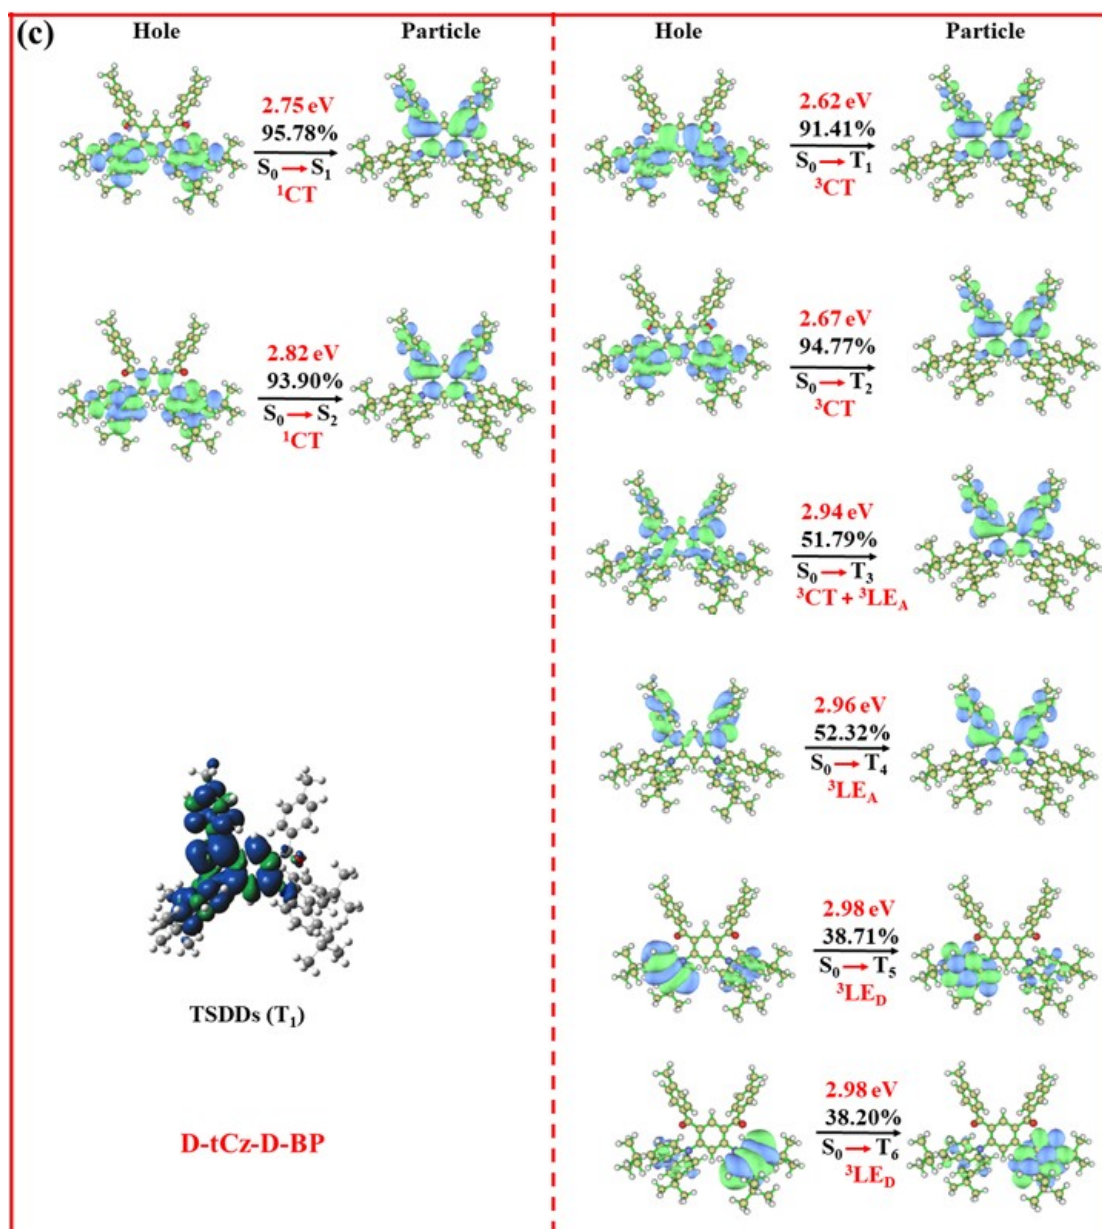

Fig. S1 The NTO calculations and TSDDs ( $T_1$ ) of *p*-tCz-BP, *o*-tCz-BP and D-tCz-D-BP.

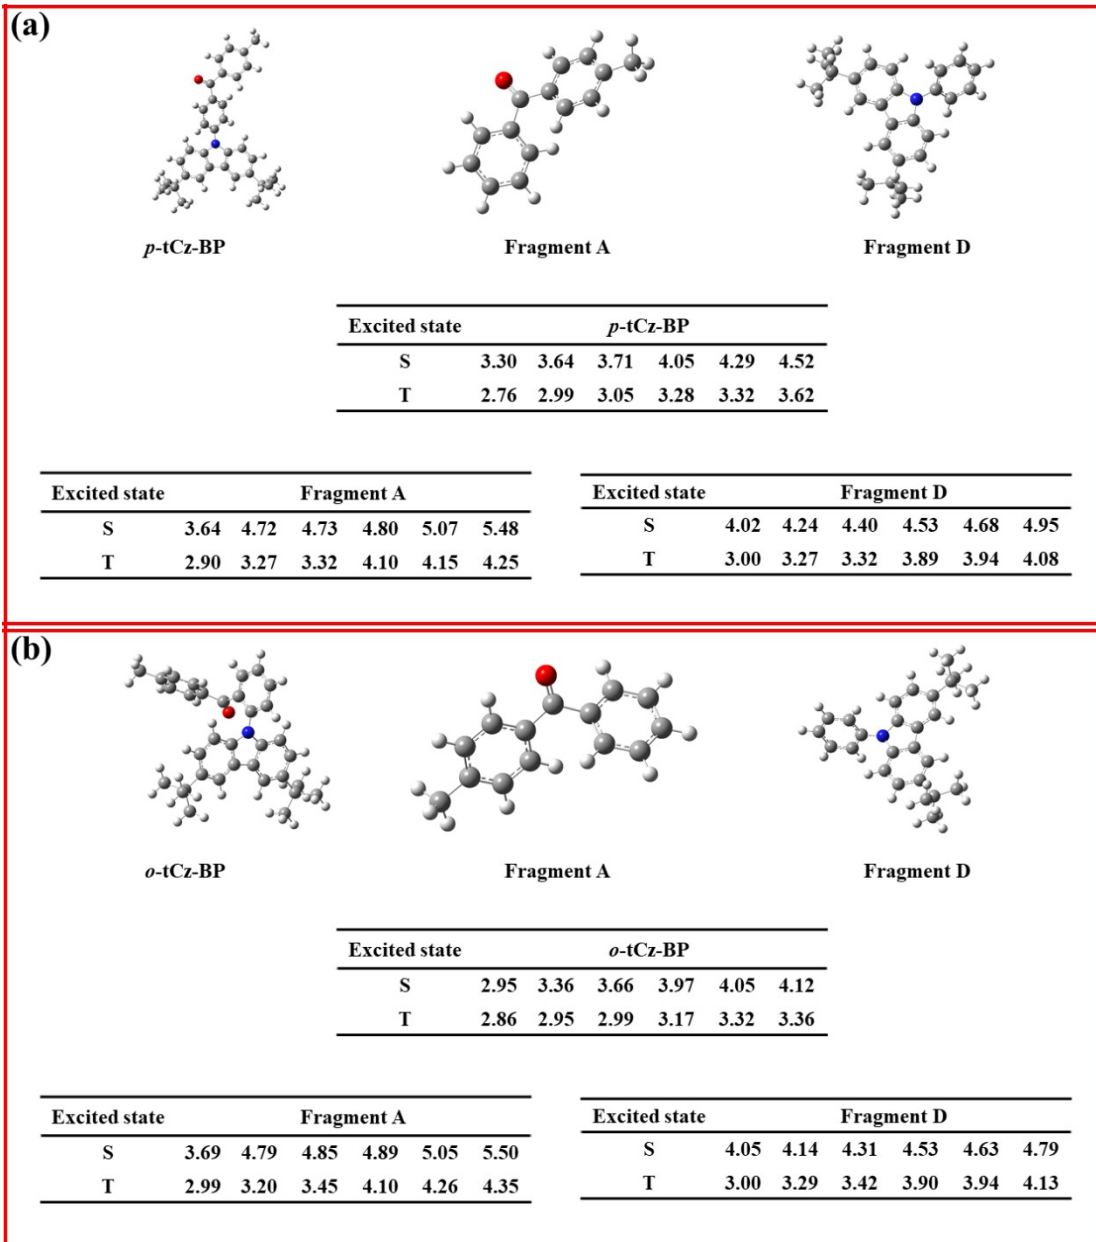

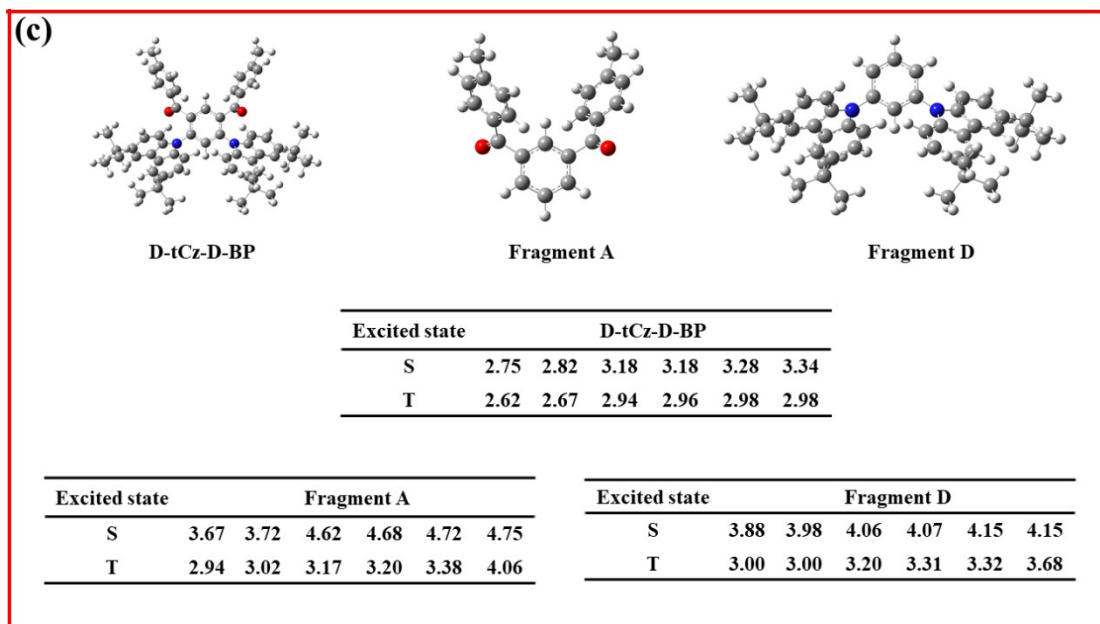

**Fig. S2** The excited state energy-levels of corresponding fragment molecules based on the optimized ground geometries of *p*-tCz-BP, *o*-tCz-BP and D-tCz-D-BP.

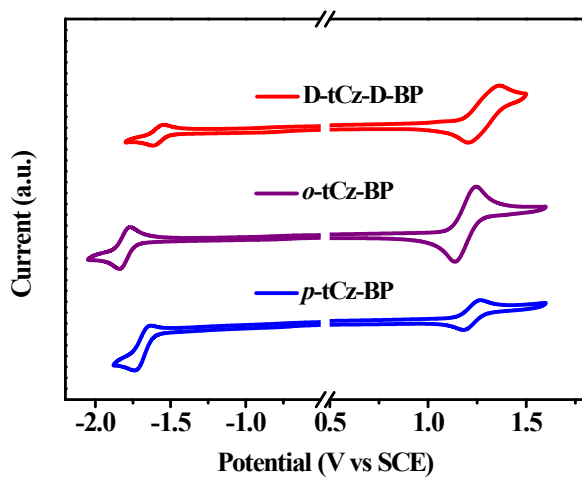

**Fig. S3** Cyclic voltammograms of *p*-tCz-BP, *o*-tCz-BP and D-tCz-D-BP.

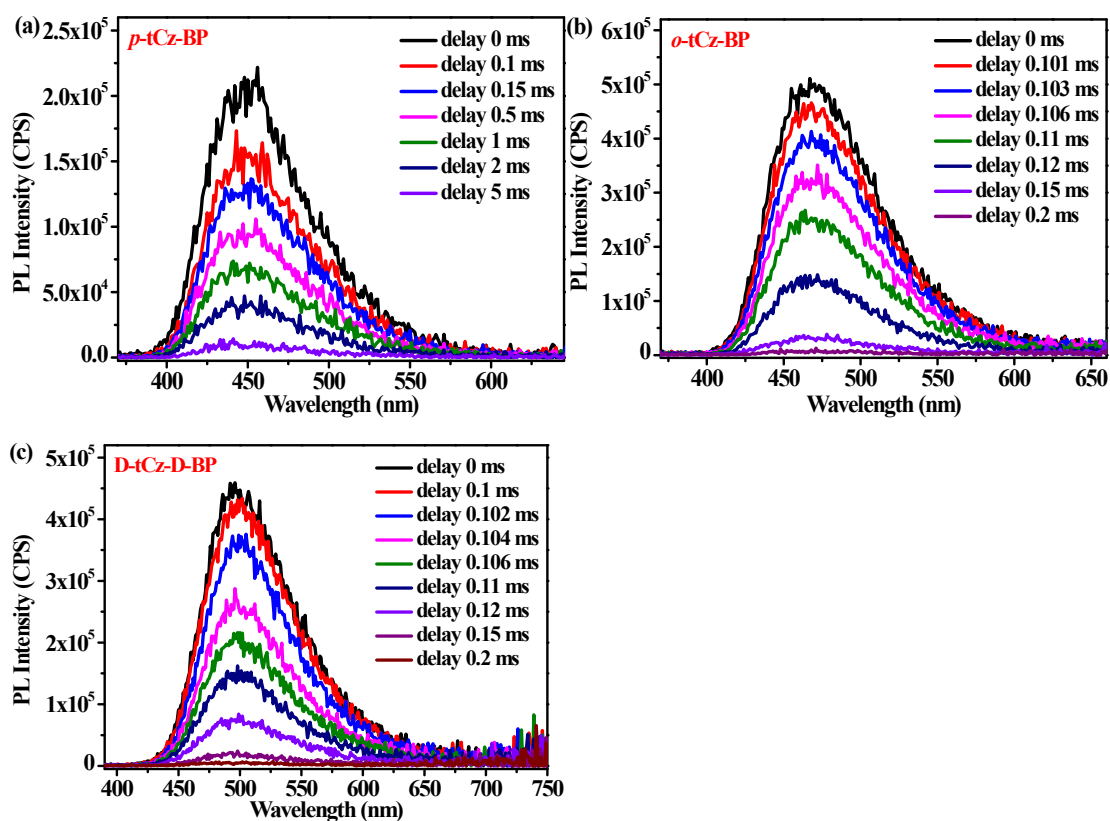

**Fig. S4** Time-resolved PL spectra of (a) *p*-tCz-BP, (b) *o*-tCz-BP, and (c) D-tCz-D-BP in 8 wt% doped PPF films at different delay time.

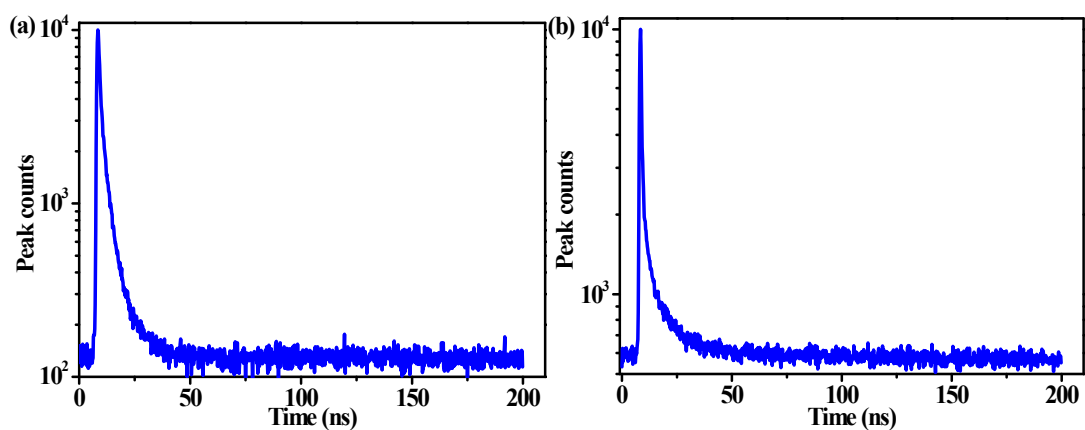



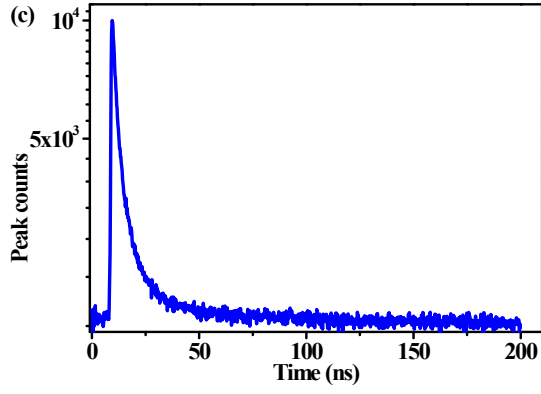

**Fig. S5** Decay curve of prompt fluorescence at room temperature for (a) *p*-tCz-BP, (b) *o*-tCz-BP and (c) D-tCz-D-BP in 8 wt% doped PPF films.

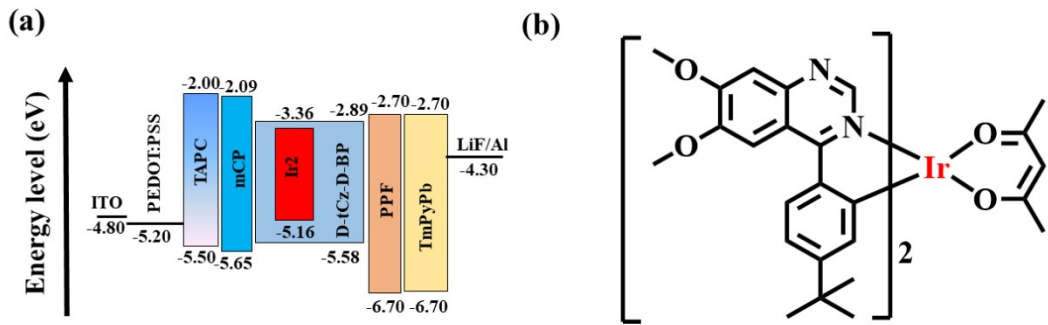

**Fig. S6** (a) Device configuration and energy level diagrams of WOLED, (b) Chemical structures of Ir2.

20220617-HZL-1-- #5-14 RT: 0.04-0.12 AV: 10 SB: 71 0.01-0.04 , 0.38-0.99 NL: 2.17E6  
T. FTMS + p ESI Full ms [200.00-1500.00]

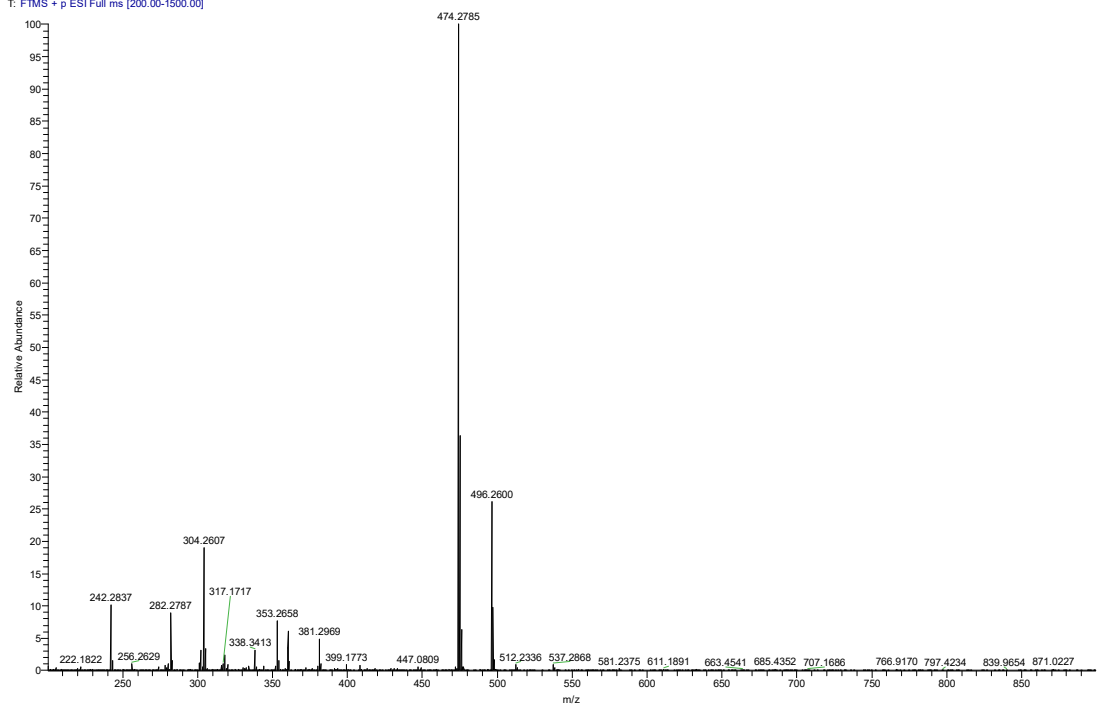

**Fig. S7** MS spectrum of *p*-tCz-BP.

20220617-HZL-2 #5-9 RT: 0.04-0.07 AV: 5 NL: 1.13E7  
T. FTMS + p ESI Full ms [200.00-1500.00]

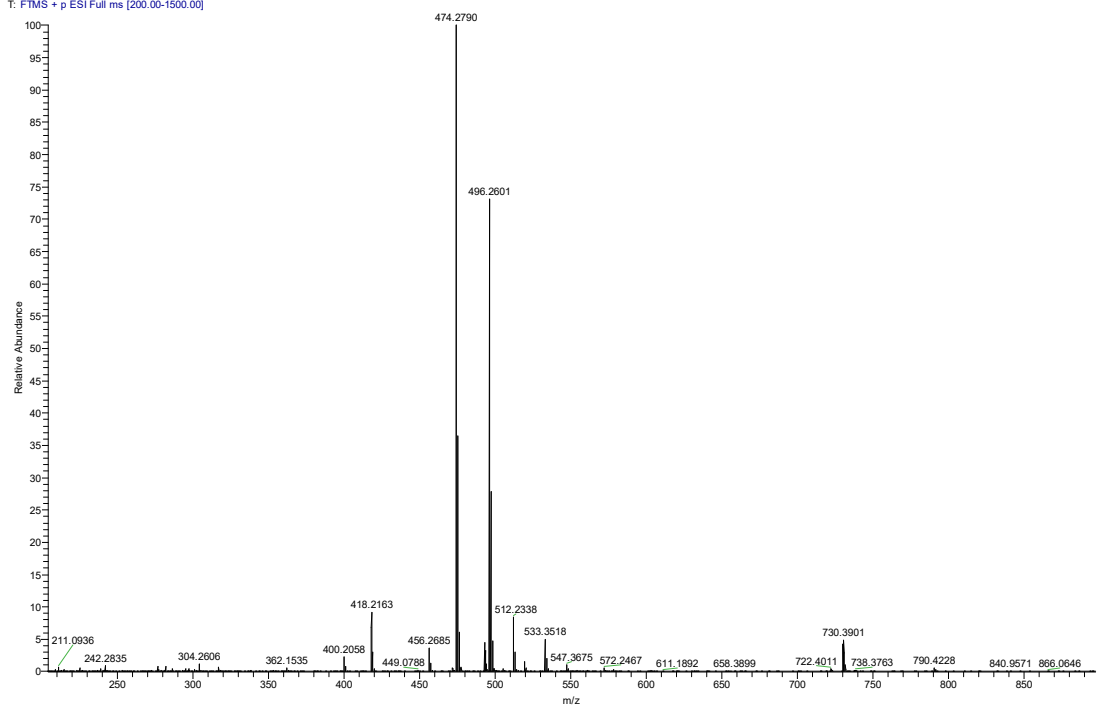

**Fig. S8** MS spectrum of *o*-tCz-BP.

20220613-hal- #14-25 RT: 0.12-0.22 AV: 12 SB: 2 0.02-0.03 NL: 1.23E5  
T: FTMS + p ESI Full ms [200.00-1500.00]

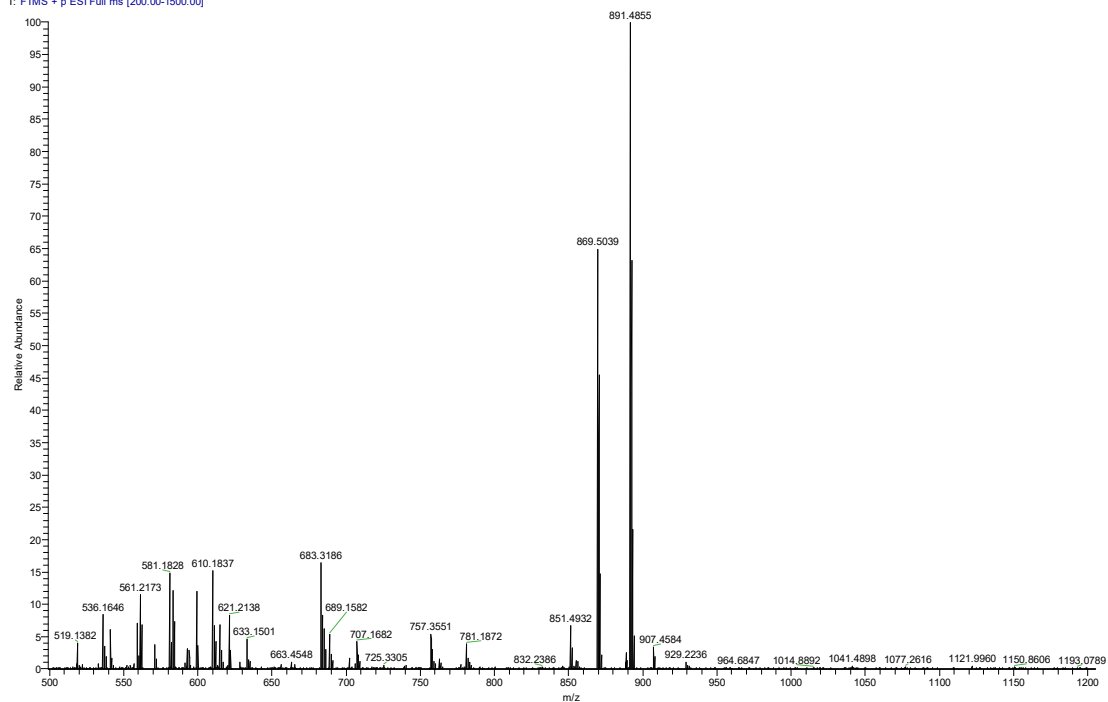

Fig. S9 MS spectrum of D-tCz-D-BP.

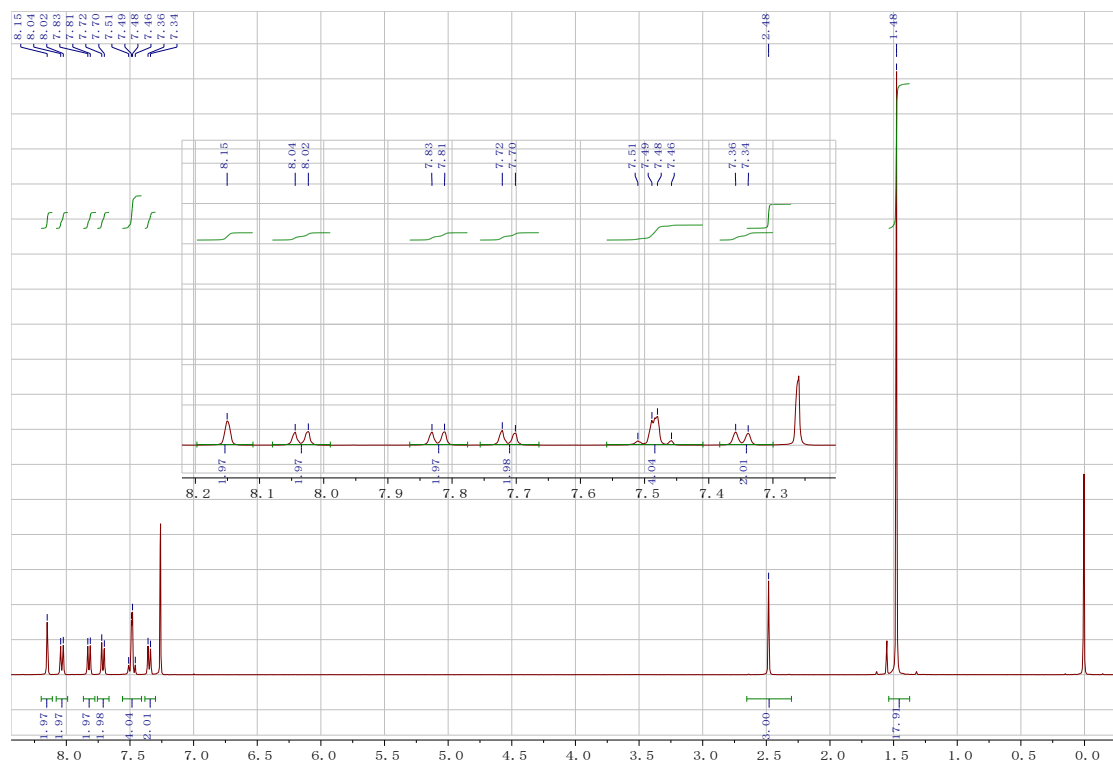

Fig. S10  $^1\text{H}$  NMR spectrum of *p*-tCz-BP.

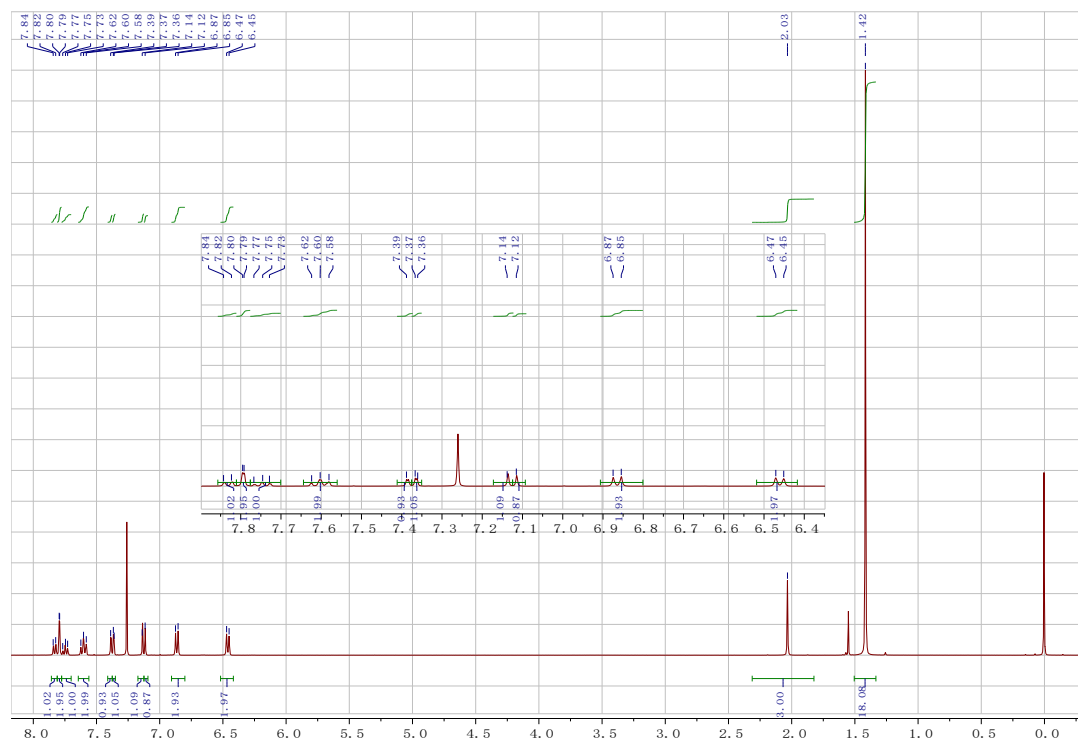

**Fig. S11**  $^1\text{H}$  NMR spectrum of *o*-tCz-BP.

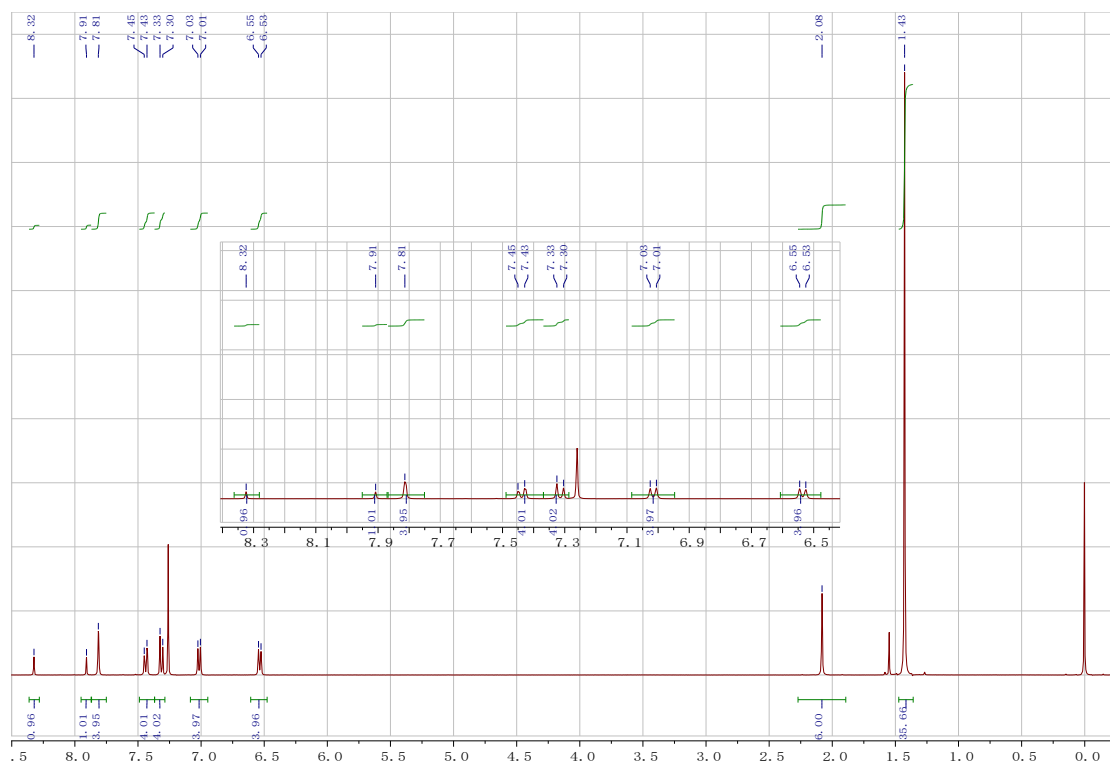

**Fig. S12**  $^1\text{H}$  NMR spectrum of D-tCz-D-BP.

## 4. References

- 1 T. Lu and F. Chen, *J Comput Chem*, 2012, **33**, 580-592.
- 2 T. Lu and Q. Chen, *J Comput Chem*, 2022, **43**, 539-555.
- 3 C. Lefebvre, G. Rubez, H. Khartabil, J. C. Boisson, J. Contreras-Garcia and E. Henon, *Phys. Chem. Chem. Phys.*, 2017, **19**, 17928-17936.
- 4 W. Li, B. Li, X. Cai, L. Gan, Z. Xu, W. Li, K. Liu, D. Chen and S. J. Su, *Angew. Chem., Int. Ed.*, 2019, **58**, 11301-11305.
- 5 R. Dong, J. Li, D. Liu, D. Li, Y. Mei, M. Ma and J. Jiang, *Adv. Opt. Mater.*, 2021, **9**, 2100970.
- 6 T. Sudyoasuk, S. Petdee, P. Chasing, P. Therdkatanyuphong, C. Kaiyasuan, W. Waengdongbung, S. Namuangruk and V. Promarak, *Dyes Pigm.*, 2021, **195**, 109721.
- 7 Y. H. Lee, S. Park, J. Oh, S.-J. Woo, A. Kumar, J.-J. Kim, J. Jung, S. Yoo and M. H. Lee, *Adv. Opt. Mater.*, 2018, **6**, 1800385.
- 8 H. L. Lee, W. J. Chung and J. Y. Lee, *Small*, 2020, **16**, 1907569.
- 9 X. Lv, Y. Wang, N. Li, X. Cao, G. Xie, H. Huang, C. Zhong, L. Wang and C. Yang, *Chem. Eng. J.*, 2020, **402**, 126173.
- 10 T. Huang, Q. Wang, S. Xiao, D. Zhang, Y. Zhang, C. Yin, D. Yang, D. Ma, Z. Wang and L. Duan, *Angew. Chem., Int. Ed.*, 2021, **60**, 23771-23776.
- 11 M. Ouyang, L. Xing, Q. Chen, H. Huang, M. Zhu, K. Hu, Y. Liu, W.-C. Chen, Y. Huo and C. Yang, *J. Mater. Chem. C*, 2021, **9**, 1678-1684.
- 12 Y. Huang, D.-H. Zhang, X.-D. Tao, Z. Wei, S. Jiang, L. Meng, M.-X. Yang, X.-

- L. Chen and C.-Z. Lu, *Dyes Pigm.*, 2022, **204**, 110397.
- 13 H.-Z. Li, F.-M. Xie, K. Zhang, Y. Shen, W. Zhou, Y.-Q. Li, W.-J. Wang and J.-X. Tang, *Chem. Eng. J.*, 2022, **436**,135234.
- 14 X. Zheng, R. Huang, C. Zhong, G. Xie, W. Ning, M. Huang, F. Ni, F. B. Dias and C. Yang, *Adv. Sci.*, 2020, **7**, 1902087..
- 15 Z. Yang, Z. Mao, C. Xu, X. Chen, J. Zhao, Z. Yang, Y. Zhang, W. Wu, S. Jiao, Y. Liu, M. P. Aldred and Z. Chi, *Chem. Sci.*, 2019, **10**, 8129-8134.
- 16 H. Chen, H. Liu, P. Shen, J. Zeng, R. Jiang, Y. Fu, Z. Zhao and B. Z. Tang, *Adv. Opt. Mater.*, 2021, **9**,2002019.
- 17 J. Zeng, J. Guo, H. Liu, Z. Zhao and B. Z. Tang, *Adv. Funct. Mater.*, 2020, **30**,2000019.
- 18 Y.-K. Wang, Q. Sun, S.-F. Wu, Y. Yuan, Q. Li, Z.-Q. Jiang, M.-K. Fung and L.-S. Liao, *Adv. Funct. Mater.*, 2016, **26**, 7929-7936.
- 19 D. Liu, D. Li, H. Meng, Y. Wang and L. Wu, *J. Mater. Chem. C*, 2019, **7**, 12470-12481.
